# Supplementary material for: GANP regulates recruitment of AID to immunoglobulin variable regions by modulating transcription and nucleosome occupancy
Source: PubMed Central journal article supplement — Nat Commun. 2013 May 7;4:1830–. doi: 10.1038/ncomms2823 (PMC3674236; doi:10.1038/ncomms2823), 2013-05-07
Supplement: ncomms2823-s1.pdf [file ncomms2823-s1.pdf]

**a**

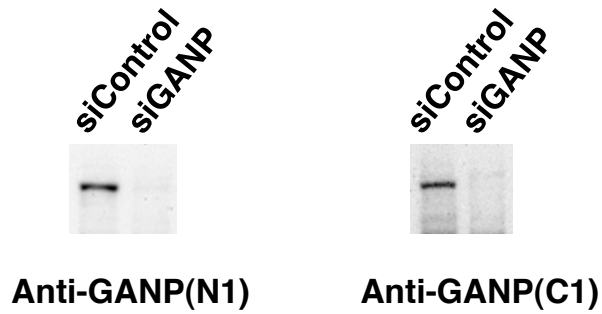

**b**

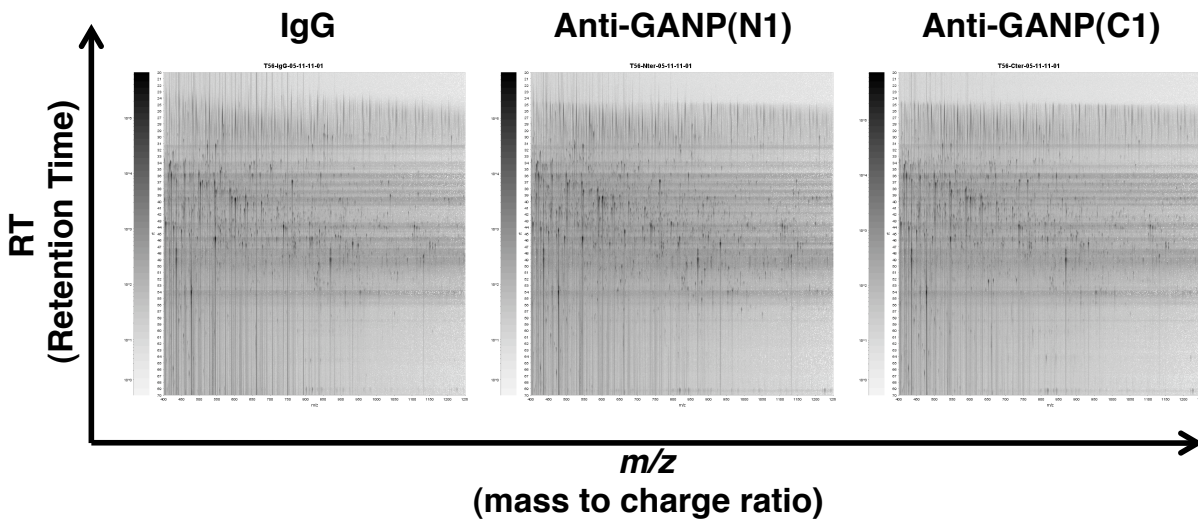

**Supplementary Figure S1.** 2DICAL analysis of GANP complex from Ramos nuclei.

(a) Specificity of the Abs was confirmed by using GANP siRNA-treated cell extract.

(b) Two-dimensional display of the entire set (>110,000) of MS peaks detected by 2DICAL with  $m/z$  values along the X-axis and retention time along the Y-axis. The images from IgG (left), anti-GANP(N1) Ab (middle), and anti-GANP(C1) Ab (right) were shown.

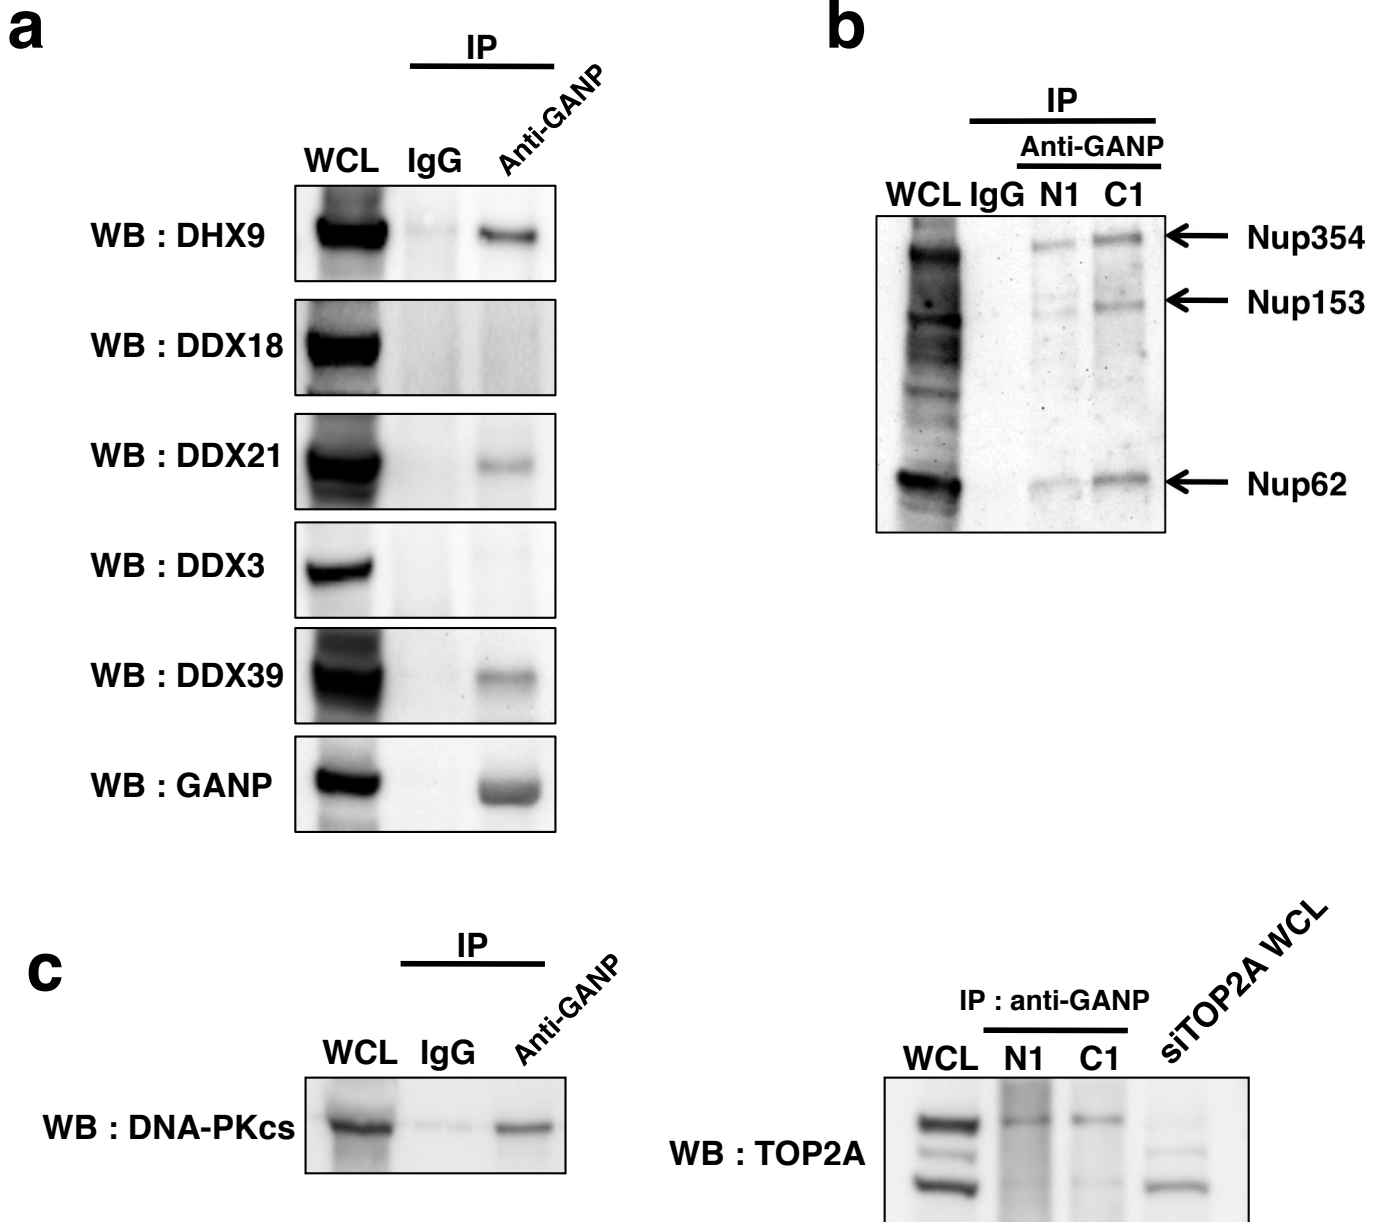

**Supplementary Figure S2.** GANP interacts with helicases, Nups, DNA-PKcs, and TOP2A in B-cell. Whole cell lysates (WCLs) from Ramos cells were IP using anti-GANP Ab. WB was carried out with indicated Abs. IgG was used as a negative control. WCL is shown in the left. Mab414 Ab recognized several Nup proteins. For the TOP2A analysis, siTOP2A-treated 293T cell extract was used as a control.

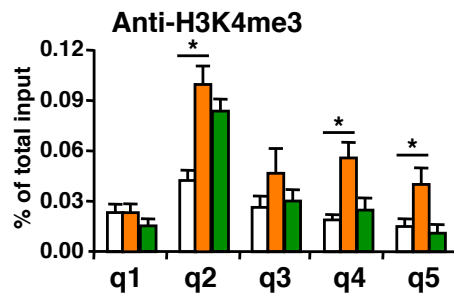

**Supplementary Figure S3.** ChIP-qPCR analysis of GFP-positive cells from GFP-alone (white columns), GFP-GANP (orange columns), and GFP- $\Delta$ HAT<sub>G</sub> (green columns) transfectants by anti-H3K4me3 Abs.

**a****AID-bound IgV**

| AID-bound IgV                           | GFP-alone | GFP-GANP |
|-----------------------------------------|-----------|----------|
| Sequence                                | 47        | 54       |
| Mutation                                | 32        | 70       |
| Total sequenced nt                      | 17,390    | 19,980   |
| Mutation frequency ( $\times 10^{-3}$ ) | 1.8       | 3.5      |
| G/A C/T mutated (%)                     | 47        | 63       |

GFP-alone

|      |   | To |    |   |   |
|------|---|----|----|---|---|
|      |   | A  | C  | G | T |
| From | A |    | 1  | 1 | 0 |
|      | C | 0  |    | 4 | 2 |
|      | G | 13 | 10 |   | 1 |
|      | T | 0  | 0  | 0 |   |

GFP-GANP

|      |   | To |   |   |    |
|------|---|----|---|---|----|
|      |   | A  | C | G | T  |
| From | A |    | 2 | 3 | 0  |
|      | C | 3  |   | 3 | 19 |
|      | G | 25 | 9 |   | 2  |
|      | T | 2  | 1 | 1 |    |

**b****H3K9ac-bound IgV**

| H3K9ac-bound IgV                        | GFP-alone | GFP-GANP |
|-----------------------------------------|-----------|----------|
| Sequence                                | 22        | 25       |
| Mutation                                | 7         | 3        |
| Total sequenced nt                      | 8,140     | 9,250    |
| Mutation frequency ( $\times 10^{-3}$ ) | 0.9       | 0.3      |

GFP-alone

|      |   | To |   |   |   |
|------|---|----|---|---|---|
|      |   | A  | C | G | T |
| From | A |    | 0 | 1 | 0 |
|      | C | 0  |   | 1 | 2 |
|      | G | 3  | 0 |   | 0 |
|      | T | 0  | 0 | 0 |   |

GFP-GANP

|      |   | To |   |   |   |
|------|---|----|---|---|---|
|      |   | A  | C | G | T |
| From | A |    | 0 | 0 | 0 |
|      | C | 0  |   | 0 | 1 |
|      | G | 1  | 0 |   | 0 |
|      | T | 0  | 1 | 0 |   |

**c****CTCF-bound IgV**

| CTCF-bound IgV                          | GFP-alone | GFP-GANP |
|-----------------------------------------|-----------|----------|
| Sequence                                | 29        | 24       |
| Mutation                                | 8         | 5        |
| Total sequenced nt                      | 8,100     | 9,250    |
| Mutation frequency ( $\times 10^{-3}$ ) | 1.0       | 0.5      |

GFP-alone

|      |   | To |   |   |   |
|------|---|----|---|---|---|
|      |   | A  | C | G | T |
| From | A |    | 0 | 0 | 0 |
|      | C | 0  |   | 2 | 1 |
|      | G | 1  | 1 |   | 0 |
|      | T | 0  | 0 | 0 |   |

GFP-GANP

|      |   | To |   |   |   |
|------|---|----|---|---|---|
|      |   | A  | C | G | T |
| From | A |    | 0 | 0 | 0 |
|      | C | 0  |   | 1 | 0 |
|      | G | 3  | 1 |   | 2 |
|      | T | 1  | 0 | 0 |   |

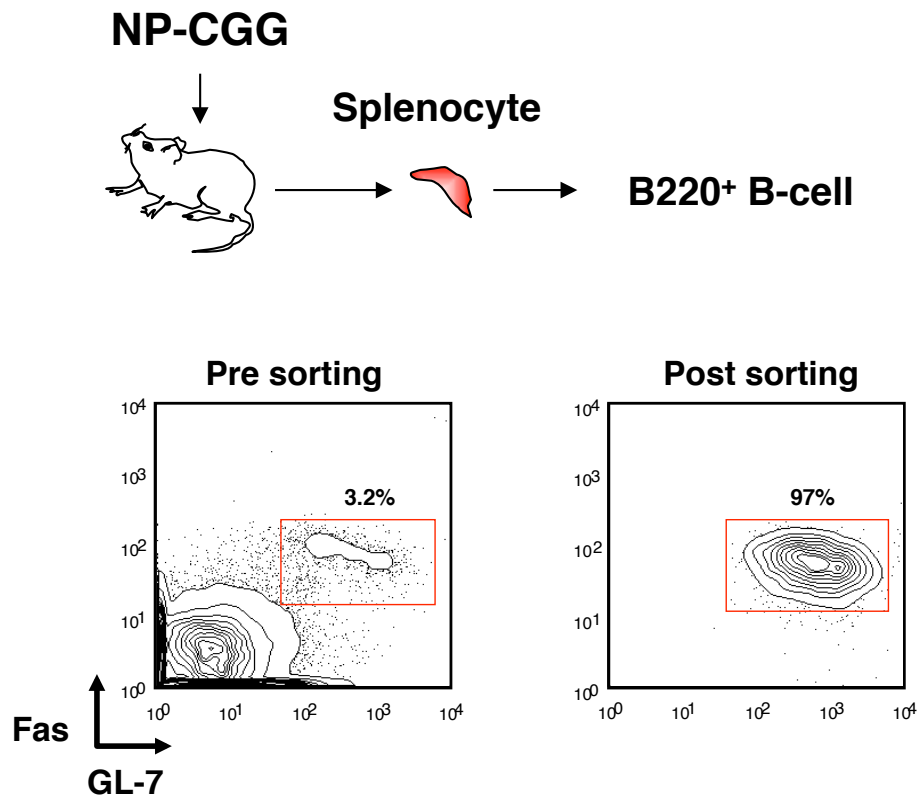

**Supplementary Figure S5. Isolation of GC B-cells.**

The AID accession to the *IgV<sub>H</sub>-region* gene was examined in B-cells from *ganp* mutant mice. Mice were immunized by the peritoneal injection of NP-CGG (100 μg/mouse) in alum. After 14 days, splenic B220<sup>+</sup> cells were obtained by MACS-beads separation and the B220<sup>+</sup>GL-7<sup>+</sup>Fas<sup>+</sup> GC B-cells were purified (>95%). ChIP was examined by DNA-ChIP assay with the primers described in Supplementary Table S3.

**Supplementary Table S1 | Potential GANP-interacting proteins in Ramos nuclei**

| Gene symbol                          | Description                                                  | Expect value | Sequence             |
|--------------------------------------|--------------------------------------------------------------|--------------|----------------------|
| <b>RNA processing &amp; splicing</b> |                                                              |              |                      |
| ARL6IP4                              | ADP-ribosylation factor-like protein 6-interacting protein 4 | 0.0000056    | SAGEEEDGCVLTDEQK     |
|                                      |                                                              | 0.0000130    | GDGEVLEEIVTK         |
| HNRNPA2B1                            | Heterogeneous nuclear ribonucleoproteins A2/B1               | 0.0002800    | IDTIEIITDR           |
| HNRNPC                               | Heterogeneous nuclear ribonucleoproteins C1/C2               | 0.0004400    | VPPPPPIAR            |
| HNRNPU                               | Heterogeneous nuclear ribonucleoprotein U                    | 0.0430000    | NFILDQTNVSAAR        |
| PNN                                  | Pinin                                                        | 0.0002200    | VELAQLQEEWNEHNAK     |
| PRPF19                               | Pre-mRNA-processing factor 19                                | 0.0000460    | TLQLDNNFEVK          |
| RBM8A                                | RNA-binding protein 8A                                       | 0.0026000    | GYTLVEYETYK          |
| SNRPE                                | Small nuclear ribonucleoprotein E                            | 0.0250000    | VMVQPTNLIIFR         |
| SFRS2B                               | Splicing factor, arginine/serine-rich 2B                     | 0.0003000    | VGDVYIPR             |
| SFRS7/9G8                            | Splicing factor, arginine/serine-rich 7                      | 0.0004300    | AFSYYGPLR            |
|                                      |                                                              | 0.0000006    | VYVGNLGTGAGK         |
| SF3B3                                | Splicing factor 3B subunit 3                                 | 0.0000009    | TVLDPVTGDLSDTR       |
| SFRS10                               | Splicing factor, arginine/serine-rich 10                     | 0.0002200    | YGPIADVSVIYDQQR      |
| DKC1                                 | H/ACA ribonucleoprotein complex subunit 4                    | 0.0036000    | LDTSQWPLLK           |
| FBL                                  | rRNA 2' -O-methyltransferase fibrillarin                     | 0.0000640    | VSISEGDDKIEYR        |
|                                      |                                                              | 0.0037000    | TNIIPVIEDAR          |
| SRRM2                                | Serine/arginine repetitive matrix protein 2                  | 0.0330000    | TAAALAPASLTSAR       |
|                                      |                                                              | 0.0006100    | TPQAPASANLVGPR       |
|                                      |                                                              | 0.0058000    | ENSFGSPLEFR          |
|                                      |                                                              | 0.0073000    | SSTGPEPPAPTPLLAER    |
| <b>Nuclear envelope</b>              |                                                              |              |                      |
| AHCTF1/ELYS                          | AT-hook-containing transcription factor 1                    | 0.0000540    | VAIAENLLDVIK         |
| LMNB1                                | Lamin-B1                                                     | 0.0005500    | AGGPTTPLSPTR         |
|                                      |                                                              | 0.0000092    | ALYETELADAR          |
|                                      |                                                              | 0.0001600    | SMYEEEINETR          |
|                                      |                                                              | 0.0055000    | LSSEMNTSTVNSAR       |
|                                      |                                                              | 0.0004700    | LREYEAALNSK          |
|                                      |                                                              | 0.0002100    | LALDMEINAYR          |
| NUP160                               | Nucleoporin Nup160                                           | 0.0340000    | TAPLLLSYLLIK         |
| NUP107                               | Nucleoporin Nup107                                           | 0.0061000    | SGFGEISSPVIR         |
| NUP85                                | Nucleoporin Nup85                                            | 0.0000640    | IMLGDEAALLEQK        |
| <b>RNA helicase</b>                  |                                                              |              |                      |
| DDX9                                 | DEAH box protein 9                                           | 0.0380000    | DFVNYLVR             |
|                                      |                                                              | 0.0005200    | ISAVSVAER            |
| DDX18                                | DEAD (Asp-Glu-Ala-Asp) box protein 18                        | 0.0490000    | LGNGINIIVATPGR       |
| DDX21                                | DEAD (Asp-Glu-Ala-Asp) box protein 21                        | 0.0000400    | VSVFFGGLSIK          |
| <b>Chromatin regulation</b>          |                                                              |              |                      |
| NSD                                  | Nuclear receptor binding SET domain protein                  | 0.0390000    | DRIIDAGPK            |
| CIR                                  | CBF1-interacting corepressor                                 | 0.0050000    | DQPFGIQVR            |
| NPM1                                 | Nucleophosmin                                                | 0.0000003    | MSVQPTVSLGGFEITPPVLR |

## Supplementary Table S2 | GANP-interacting histones in Ramos nuclei

| Gene symbol     | Expect value | Sequence            |
|-----------------|--------------|---------------------|
| <b>Histones</b> |              |                     |
| Histone H1.2    | 0.000063     | SGVSLAALK           |
| Histone H1.5    | 0.000110     | ATGPPVSELITK        |
| Histone H1.5    | 0.008700     | ALAAGGYDVEK         |
| Histone H1t     | 0.000100     | ALAAAGYDVEK         |
| <br>            |              |                     |
| Histone H2A     | 0.000001     | AGLQFPVGR           |
| Histone H2A     | 0.000000     | VTIAQGGVLPNIQAVLLPK |
| Histone H2A     | 0.000000     | VTIAQGGVLPNIQAVLLPK |
| Histone H2A     | 0.000930     | GDEELDSLIIK         |
| <br>            |              |                     |
| Histone H2B     | 0.000150     | ESYSIYVYK           |
| Histone H2B     | 0.000000     | AMGIMNSFVNDIFER     |
| Histone H2B     | 0.000008     | AMGIMNSFVNDIFER     |
| Histone H2B     | 0.000000     | AMGIMNSFVNDIFER     |
| Histone H2B     | 0.000000     | AMGIMNSFVNDIFER     |
| Histone H2B     | 0.000000     | AMGIMNSFVNDIFER     |
| Histone H2B     | 0.000220     | LLLPGELAK           |
| Histone H2B     | 0.035000     | KESYSVYVYK          |
| <br>            |              |                     |
| Histone H3      | 0.001800     | STELLIR             |
| Histone H3      | 0.006700     | YRPGTVALR           |
| <br>            |              |                     |
| Histone H4      | 0.000001     | DNIQGITKPAIR        |
| Histone H4      | 0.000001     | ISGLIYEETR          |
| Histone H4      | 0.000000     | TVTAMDVVYALK        |
| Histone H4      | 0.002100     | TVTAMDVVYALK        |
| Histone H4      | 0.000009     | TVTAMDVVYALK        |
| Histone H4      | 0.000000     | TVTAMDVVYALK        |
| Histone H4      | 0.000082     | KTVTAMDVVYALK       |
| Histone H4      | 0.000005     | DNIQGITKPAIR        |
| Histone H4      | 0.001000     | VFLENVIR            |

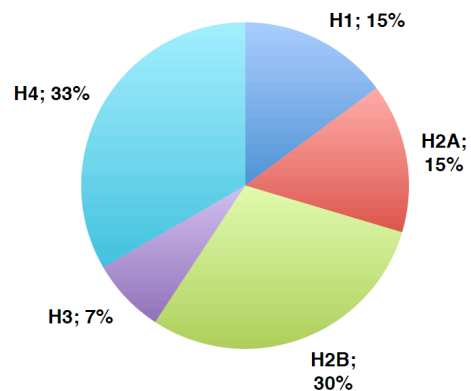

**Supplementary Table S3 | Primers, probes, and siRNA**

|         | sense                          | antisense                       |
|---------|--------------------------------|---------------------------------|
| q1      | GGCACAGCCAGCATAACCT            | AGGATTTGCATGTGGGTGGT            |
| q2      | CATGCAAATCCTCACTTAGGCA         | AGGTCCATGACTCTCAGAAAGCA         |
| q3      | GCTTTCTGAGAGTCATGGACCTC        | CGCATTCCTGAGACACTCACAT          |
| q4      | CAGCAACTACAACCCGTCCC           | TGTCCGCGGCGTTC                  |
| q5      | GACACGTCCAAGAAACAGC            | GCCCTAGTAATAACTCTCGC            |
| DP63-01 | ATGAAACACCTGTGGTTCCTCCTCCTG    | TGGGATCAGAGGCAGCATCTCATATCTTCA  |
| DP63-02 | GTGGCAGCTCCCAGATGTGAGTGTCTCAGG | CCTGTGAACAGAAAACCCACAGTGAGCCC   |
| DP63-03 | AATGCGGATATGAAGATATGAGATGCTGCC | CACTGCTGTAGCTGCACCTGGGACAGGACC  |
| DP63-04 | TCTGATCCCAGGGCTCACTGTGGGTTTTTC | GTCTCCGAAGGCTTCAACAGTCTTGCGCC   |
| DP63-05 | TGTTACAGGGGTCTGTCCCAGGTGCAGC   | CCACCATAAACACCCGAGGTGAGGGACAGG  |
| DP63-06 | TACAGCAGTGGGGCGCAGGACTGTTGAAGC | ATCCAGCTCCAGTAGTAACCACTGAAGGAC  |
| DP63-07 | CTTCGGAGACCCTGTCCCTCACCTGCGGTG | CACTCCAGCCCCCTTCCCTGGGGGCTGGCGG |
| DP63-08 | TTTATGGTGGGTCTTCAGTGGTTACTACT  | CTGCTTCCACTATGATTGATTTCCCAATC   |
| DP63-09 | GGAGCTGGATCCGCCAGCCCCAGGGAAGG  | ACTCGACTCTTGAGGGACGGGTTGTAGTTG  |
| DP63-10 | GGCTGGAGTGGATTGGGGAAATCAATCATA | TGTTTCTTGACGTGTCTACTGATATGGTG   |
| DP63-11 | GTGGAAGCAGCAACTACAACCCGTCCCTCA | GCGTTCACAGAGCTCAACTTCAGGGAGAGC  |
| DP63-12 | AGAGTCGAGTCACCATATCAGTAGACACGT | CTCGCACAGTAATACACAGCCGTGTCCGCG  |
| DP63-13 | CCAAGAAACAGCTCTCCCTGAAGTTGAGCT | TCTGTGCCAGGACTCGCCCTAGTAATAACT  |
| DP63-14 | CTGTGAACGCCGCGGACACGGCTGTGTATT | TGGCCCCAGACGTCCATACCGTACCTCCCG  |
| DP63-15 | ACTGTGCGAGAGTTATTACTAGGGCGAGTC | CTGAGGAGACGGTGACCGTGGTCCCT      |
| VH186.2 | CTGCAAGGCTTCTGGCTACAC          | TCAATCCTTCCAATCCACTC            |
| p53     | ACAGCGTGGTGGTACCTTAT           | TATACTCAGAGCCGGCCT              |

|        | TaqMan probe  |
|--------|---------------|
| mAICDA | Mm00507774_m1 |
| mGANP  | Mm00490242_m1 |
| mGAPDH | Mm99999915_g1 |



---

MISSION siRNA

---

|         |                    |
|---------|--------------------|
| GANP    | SASI_Hs01_00195876 |
| TOP2A   | SASI_Hs02_00311873 |
| control | SIC-001            |

---
